# Supplementary material for: A Molecular Binuclear Nickel (II) Schiff Base Complex for Efficient HER Electrocatalysis
Source: MDPI journal article supplement (doi:10.3390/catal13101348), 2023-10-06
Supplement: s1 [file s1]

Archive with 1 entries (1 files):
- catalysts-2611559-supplementary.pdf
